# Supplementary material for: First report of autochthonous canine leishmaniosis in Hong Kong
Source: Research Square preprint supplement (doi:10.21203/rs.3.rs-1751674/v1), 2022-06-15
Supplement: Supplementary file 1 [file 3a58615bc11cb3a756105202.docx]

Table 1. Signalment, origin, main test results and *Leishmania* treatment outcome of eight dogs living in the same kennel investigated for leishmaniosis.

| Dog | Dog country of origin | Relationship with other dogs in kennel | Year of birth | Detection and anatomic location of *Leishmania* amastigotes by microscopy | ELISA  Serology | PCR result and tissue | *Leishmania* treatment/outcome |
| --- | --- | --- | --- | --- | --- | --- | --- |
| 1 | USA | Sire of dog 5 | 2011 | Yes: Dermis | - | - (blood)* | Disease relapsed but now resolved |
| 2 | Hong Kong | Full brother of dog 3 | 2012 | Yes: Spleen and liver | +** | + (blood, spleen) | Disease relapsed but now resolved |
| 3 | Hong Kong | Full sister of dog 2 | 2019 | No | - | - (blood and skin) | NA |
| 4 | Netherlands | None | 2009 | No | - | - (blood and skin) | NA |
| 5 | Hong Kong | Son of dog 1 | 2013 | ND | - | - (blood) | NA |
| 6 | Hong Kong | None | 2011 | ND | - | - (blood) | NA |
| 7 | Sweden | None | 2011 | ND | - | - (blood) | NA |
| 8 | Hong Kong | None | 2012 | ND | - | - (blood) | NA |

- negative result; + positive result; ND: Not done; NA Not applicable.

* Dog 1 had two rounds of PCR testing on EDTA blood. Quantitative species *Leishmania* PCR performed by IDEXX Reference Laboratory, United Kingdom. Approximately five years later, PCR performed by Koret School of Veterinary Medicine, the Hebrew University, Israel.

** Dog 2 had two rounds of ELISA serology. One performed by Texas A and M veterinary medical diagnostic laboratory. Second test performed 2 months later by Koret School of Veterinary Medicine, the Hebrew University, Israel.
